# Supplementary material
Source: PubMed Central journal article supplement (PMC5991803)
Supplement: NIHMS969195-supplement-supplement_1.pdf [file NIHMS969195-supplement-supplement_1.pdf]

## SUPPLEMENTAL ONLINE APPENDIX

Source instruments and constructs used to develop survey

| Source instrument                                                             | Construct measured                           | Number of items |
|-------------------------------------------------------------------------------|----------------------------------------------|-----------------|
| Team Diagnostic Survey (TDS); <sup>12</sup>                                   | Real team                                    | 3               |
|                                                                               | Team composition: size and skills            | 4               |
|                                                                               | Group norms                                  | 2               |
|                                                                               | Effort-related process criteria              | 2               |
|                                                                               | Knowledge and skill-related process criteria | 1               |
|                                                                               | Team interpersonal processes                 | 2               |
|                                                                               | Supportive organizational context            | 3               |
| Attitudes Toward Health Care Team Scale <sup>13</sup>                         | Attitudes toward team value                  | 2               |
|                                                                               | Attitudes toward team efficiency             | 3               |
| Team Climate Inventory (TCI) <sup>14</sup>                                    | Participatory safety                         | 4               |
|                                                                               | Task orientation                             | 1               |
|                                                                               | Support for innovation                       | 2               |
| Minimizing Error, Maximizing Outcome (MEMO) <sup>15</sup>                     | Quality emphasis                             | 7               |
|                                                                               | Chaos                                        | 1               |
|                                                                               | Global satisfaction                          | 1               |
| AHRQ TeamSTEPPS Teamwork Perceptions Questionnaire (AHRQ T-TPQ) <sup>16</sup> | Team structure                               | 5               |
|                                                                               | Situation monitoring                         | 5               |
|                                                                               | Mutual support                               | 2               |
|                                                                               | Leadership                                   | 7               |

|                                                                           |                                                                                                                    |                       |
|---------------------------------------------------------------------------|--------------------------------------------------------------------------------------------------------------------|-----------------------|
| TransforMed Clinician Staff Questionnaire (TransforMed CSQ) <sup>17</sup> | Relationship infrastructure<br>Work environment<br>Sensemaking<br>Culture of learning                              | 5<br>1<br>1<br>1      |
| AHRQ Medical Office Survey on Patient Safety Culture <sup>18</sup>        | Teamwork (safety)<br>Communication openness<br>Organizational learning<br>Work pressure and pace<br>Staff training | 4<br>3<br>3<br>4<br>2 |
| Organizational Readiness to Change Assessment (ORCA) <sup>19</sup>        | Readiness for change: culture<br>Readiness for change                                                              | 7<br>3                |
